# Supplementary material for: Dynamic Changes in Plant Secondary Metabolites Induced by Botrytis cinerea Infection
Source: MDPI journal article supplement (doi:10.3390/metabo13050654), 2023-05-13
Supplement: s1 [file s1]

Table S1 Analysis of Gas chromatography / quadrupole time-of-flight mass on differential non-volatile metabolites of grape ‘Victoria’ that was either non-inoculated (NI), inoculated with *Botrytis cinerea* B05.10 (B5), or inoculated with *B. cinerea* 242 (B2)

| Compound     |                                    | Retention Time | Mass     | Log <sub>2</sub> FC (B5 – NI] | Log <sub>2</sub> FC (B2 - NI] |
|--------------|------------------------------------|----------------|----------|-------------------------------|-------------------------------|
| Saccharides  | D-(-)-Erythrose                    | 12.7           | 73.0475  | 13.1                          | 16.4                          |
|              | D-(-)-Ribofuranose                 | 13.6           | 73.0475  | 14.33                         | 14.4                          |
|              | D-(-)-Rhamnose                     | 14.9           | 117.0382 | -1                            | -18.8                         |
|              | L-(-)-Sorbose                      | 16.6           | 201.1037 | 3.4                           | 21.6                          |
|              | D-(-)-Fructose                     | 16.7           | 307.1468 | 15.9                          | 16.7                          |
|              | D-Glucose                          | 16.8           | 103.0574 | 3.5                           | 23                            |
|              | D-(+)-Talose                       | 16.9           | 217.1086 | 3.5                           | -21.4                         |
|              | 4-Ketoglucose                      | 19.8           | 73.0475  | 16.9                          | -0.2                          |
|              | Glyceryl-glycoside                 | 20.4           | 204.1014 | 0.4                           | -14.3                         |
|              | D-(+)-Cellobiose                   | 20.5           | 204.1013 | -0.6                          | -1.1                          |
|              | Maltose                            | 21             | 204.1013 | -0.9                          | -1.7                          |
|              | 2- $\alpha$ -Mannobiose            | 21.1           | 204.1013 | -1.2                          | -2.6                          |
|              | D-Ribose                           | 21.1           | 205.1065 | 3.5                           | 17.6                          |
|              | D-Glucopyranose                    | 21.4           | 204.1015 | 11.4                          | 10.9                          |
|              | D-Psicose                          | 23.9           | 307.1423 | -1                            | -1.4                          |
|              | D-Trehalose                        | 24.2           | 217.1086 | 14.7                          | 14.6                          |
|              | $\beta$ -Gentiobiose               | 25             | 361.1725 | 2.6                           | 2.8                           |
|              | Palatinose                         | 29.3           | 361.1726 | 19.6                          | -0.2                          |
| Amino acid   | L-Valine                           | 6.5            | 72.0388  | -2.6                          | -23                           |
|              | L-Threonine                        | 9.5            | 73.0475  | -2.3                          | -3.4                          |
|              | L-Threitol                         | 12.4           | 73.0475  | 1.7                           | 1.2                           |
|              | L-5-Oxoproline                     | 12.5           | 156.0755 | 22.1                          | 14.7                          |
|              | Phenylalanine                      | 12.7           | 120.0832 | -18.9                         | -22.5                         |
| Organic acid | 2,6-Dihydroxybenzoic acid          | 7.4            | 267.1121 | -3.4                          | 13.4                          |
|              | Phosphoric acid                    | 7.9            | 241.0994 | -12.7                         | 3.2                           |
|              | Butanoic acid                      | 10.3           | 73.0475  | 19.7                          | 9.5                           |
|              | Butanedioic acid                   | 10.6           | 147.0669 | -1                            | -0.61                         |
|              | Pipecolic acid                     | 12.5           | 156.0816 | -20.4                         | -20                           |
|              | $\gamma$ -aminobutyric acid        | 12.5           | 174.1079 | 23.4                          | 15.6                          |
|              | N-Acetylaspartylglutamic acid      | 12.5           | 304.1394 | -14.1                         | -17.7                         |
|              | Arabinonic acid                    | 13.8           | 73.0475  | 17.7                          | 15.9                          |
|              | 2-Keto-l-gluconic acid             | 15.5           | 73.0475  | -2                            | -2.4                          |
|              | D-(+)-Glucuronic acid              | 16.1           | 73.0475  | 14.6                          | 13.9                          |
|              | 2-Ketoglutaric acid                | 16.6           | 319.1606 | 1.1                           | 1.3                           |
|              | Galactaric acid                    | 17.8           | 73.0475  | 16.2                          | 16.3                          |
|              | Gluconic acid                      | 19.5           | 73.0475  | 17.8                          | 13.6                          |
|              | 1-Aminocyclopentanecarboxylic acid | 20.6           | 204.1012 | -7.1                          | -17.6                         |

| Compound |                       | Retention<br>Time | Mass     | Log <sub>2</sub> FC<br>(B5 – NI] | Log <sub>2</sub> FC<br>(B2 - NI] |
|----------|-----------------------|-------------------|----------|----------------------------------|----------------------------------|
|          | cis-Coutaric acid     | 22.8              | 219.0944 | -1                               | -1.3                             |
| Alcohol  | D-(+)-Arabitol        | 14.5              | 129.0707 | -9.7                             | -16.7                            |
|          | D-Mannitol            | 17.1              | 204.1013 | -16.1                            | -16.4                            |
|          | D-Glucitol            | 21.1              | 73.0475  | 0.3                              | 1.3                              |
|          | Maltitol              | 27.2              | 73.0475  | -0.8                             | -1                               |
|          | Betulin               | 28.8              | 216.0913 | 18.4                             | 17.5                             |
| Ester    | Dimethyl tartarate    | 12.9              | 73.0475  | -1.3                             | -0.7                             |
| Phenol   | 3-Pyridinol           | 7.2               | 152.0532 | 21                               | 13.8                             |
|          | Arbutin               | 22.7              | 73.0475  | 12.1                             | 12.3                             |
|          | Resveratrol           | 23.5              | 444.2012 | 2.8                              | 0.9                              |
|          | Aucubin               | 23.8              | 361.1722 | -0.5                             | -11.6                            |
|          | trans-Piceid          | 26                | 354.1563 | 19.9                             | 12.5                             |
|          | cis-Piceid            | 27.7              | 444.2025 | 2.6                              | 1.9                              |
| Other    | Cyclohexasiloxane     | 9.8               | 341.0213 | -3.2                             | 13.1                             |
|          | β-Lyxopyranose        | 14.1              | 147.0668 | -17.1                            | -17.3                            |
|          | Copper phthalocyanine | 26.7              | 202.1044 | 20.9                             | -0.2                             |

Table S2 Analysis of Gas chromatography / quadrupole time-of-flight mass on differential non-volatile metabolites leaves of grape ‘Shine Muscat’ that was either non-inoculated (NI), inoculated with *Botrytis cinerea* B05.10 (B5) or inoculated with *B. cinerea* 242 (B2)

| Compound     |                             | Retention Time | Mass     | Log <sub>2</sub> FC (B5 - NI) | Log <sub>2</sub> FC (B2 - NI) |
|--------------|-----------------------------|----------------|----------|-------------------------------|-------------------------------|
| Saccharides  | 4-Ketoglucose               | 14.6           | 73.0474  | 3.2                           | 16                            |
|              | L-(-)-Sorbose               | 16.5           | 349.1506 | -0.1                          | 16.4                          |
|              | D-Allose                    | 19.2           | 73.0474  | -0.1                          | 16.2                          |
|              | D-(+)-Cellobiose            | 20.8           | 204.1013 | -3.6                          | 14.5                          |
|              | Glucose                     | 21.3           | 204.1017 | -0.1                          | 16.7                          |
|              | D-Glucopyranose             | 21.4           | 204.1013 | -0.1                          | 17                            |
| Amino acid   | L-Serine                    | 9              | 116.0545 | 16                            | -0.7                          |
|              | L-Threonine                 | 9.5            | 73.0474  | 13.5                          | -0.7                          |
| Organic acid | γ-aminobutyric acid         | 12.5           | 174.1062 | -0.1                          | 15.8                          |
|              | Arabinonic acid             | 13.8           | 73.0474  | -0.1                          | 16.9                          |
|              | D-Glucopyranosiduronic acid | 21.9           | 73.0474  | -0.1                          | 15.4                          |
|              | Mandelic acid               | 25.3           | 297.1329 | -0.1                          | 12.5                          |
| Alcohol      | 3-Methoxythiophenol         | 10.2           | 213.0726 | -0.1                          | 15.9                          |
|              | L-Threitol                  | 12.2           | 73.0474  | 3.1                           | 15.7                          |
|              | Glycerol                    | 12.6           | 73.0475  | 13.4                          | -0.7                          |
|              | Betulin                     | 28.8           | 216.0922 | -0.1                          | 17.7                          |
| Ester        | D-(+)-Ribono-1,4-lactone    | 14.3           | 73.0474  | -0.1                          | 12.4                          |
| Phenol       | Resveratrol                 | 23.5           | 444.2012 | 2.762733                      | 2.6                           |
|              | cis-Piceid                  | 27.7           | 444.2025 | 1.4                           | 1.6                           |

Table S3 Differential metabolites compared grapes varieties ‘Shine Muscat’ and ‘Victoria’ that were either inoculated with *Botrytis cinerea* B05.10, inoculated with *B. cinerea* 242, or non-inoculated

| Grape and inoculation | Compound                       | Retention Time | Mass     | Regulation | Log <sub>2</sub> FC |
|-----------------------|--------------------------------|----------------|----------|------------|---------------------|
| S-NI & V-NI           | Lactic Acid                    | 6.1            | 147.0670 | up         | 1.1                 |
|                       | L-Serine                       | 8.9            | 116.0551 | down       | -23.8               |
|                       | L-Threonine                    | 9.4            | 73.0475  | down       | -23.8               |
|                       | Oxalic acid                    | 10.4           | 147.0668 | down       | -22.5               |
|                       | Shikimic acid                  | 15.7           | 204.1013 | down       | -1.8                |
|                       | β-D-Glucopyranose              | 20.5           | 204.1013 | down       | -22.4               |
|                       | Ethyl α-D-glucopyranoside      | 20.5           | 204.1013 | down       | -23.1               |
|                       | Maltose                        | 21.0           | 204.1013 | down       | -23.3               |
|                       | Hexopyranose                   | 22.4           | 73.0475  | down       | -22.7               |
|                       | Catechine                      | 24.6           | 368.1678 | down       | -22.8               |
| S-B5 & V-B5           | Lactic Acid                    | 6.1            | 147.0671 | down       | -22.4               |
|                       | L-Serine                       | 9.0            | 174.1079 | down       | -22.5               |
|                       | Ethanolamine                   | 9.1            | 174.1009 | up         | 23.8                |
|                       | Phosphonic acid                | 9.2            | 299.0739 | up         | 1.2                 |
|                       | Glyceric acid                  | 10.0           | 73.0474  | up         | 1.3                 |
|                       | Butanedioic acid               | 10.5           | 147.0671 | down       | -22.5               |
|                       | L-Aspartic acid                | 11.1           | 73.0475  | down       | -22.5               |
|                       | Pipecolic acid                 | 12.5           | 84.0439  | down       | -23.8               |
|                       | γ-aminobutyric acid            | 12.5           | 174.1079 | down       | -22.9               |
|                       | Tartaric acid                  | 13.2           | 73.0474  | up         | 26.1                |
|                       | Arabinonic acid                | 14.9           | 73.0475  | up         | 1.0                 |
|                       | D-(-)-Tagatofuranose           | 15.3           | 73.0474  | up         | 1.2                 |
|                       | N-Acetyl glucosamine methoxime | 15.5           | 73.0475  | down       | -21.9               |
|                       | Fructofuranoside               | 15.6           | 73.0475  | down       | -22.1               |
|                       | Shikimic acid                  | 15.7           | 204.1015 | down       | -1.8                |
|                       | D-Fructose                     | 16.5           | 217.1087 | down       | -26.3               |
|                       | D-(-)-Fructose                 | 16.6           | 307.1459 | down       | -24.5               |
|                       | D-Mannitol                     | 17.0           | 319.161  | down       | -25.3               |
|                       | Palatinose                     | 17.3           | 73.0475  | down       | -23.2               |
|                       | β-D-Glucopyranose              | 20.5           | 204.1018 | down       | -22.1               |
|                       | Ethyl α-D-glucopyranoside      | 20.6           | 204.1018 | down       | -22.4               |
|                       | D-glucose-6-phosphate          | 20.7           | 387.146  | up         | 1.3                 |
|                       | Resveratrol                    | 23.3           | 169.0692 | down       | -19.2               |
|                       | D-Trehalose                    | 24.1           | 73.0474  | up         | 18.7                |
|                       | Catechine                      | 24.6           | 368.1694 | down       | -1.1                |
|                       | β-Gentiobiose                  | 25.0           | 361.1732 | down       | -22.4               |

| Grape and inoculation | Compound               | Retention Time | Mass     | Regulation | Log <sub>2</sub> FC |
|-----------------------|------------------------|----------------|----------|------------|---------------------|
| S-B2 & V-B2           | Epigallocatechin       | 25.1           | 456.2044 | down       | -21.9               |
|                       | Galactinol             | 25.7           | 204.1015 | up         | 1.2                 |
|                       | L-Serine               | 9.0            | 174.1056 | up         | 22.8                |
|                       | 1,3-Propanediol        | 10.4           | 147.0671 | down       | -22.5               |
|                       | Malic acid             | 12.1           | 147.0671 | down       | -20.7               |
|                       | Pipecolic acid         | 12.5           | 84.0436  | up         | 2.3                 |
|                       | Tartaric acid          | 13.2           | 73.0474  | up         | 18.3                |
|                       | L-(+)-Tartaric acid    | 13.9           | 294.1348 | down       | -23.5               |
|                       | 2-Keto-l-gluconic acid | 15.4           | 292.1368 | up         | 1.2                 |
|                       | Fructofuranoside       | 15.6           | 217.1085 | down       | -22.8               |
|                       | Shikimic acid          | 15.7           | 204.1015 | down       | -1.5                |
|                       | 2-Ketoglutaric acid    | 16.6           | 129.071  | up         | 16.7                |
|                       | d-Galactose            | 16.7           | 73.0474  | up         | 1.9                 |
|                       | Palatinose             | 17.3           | 73.0476  | down       | -17.2               |
|                       | β-D-Glucopyranose      | 20.5           | 204.1015 | down       | -22.2               |
|                       | cis-Coutaric acid      | 23.7           | 219.094  | up         | 18.6                |
|                       | D-(+)-Turanose         | 23.9           | 307.1408 | up         | 23.0                |
|                       | L-Alanine              | 24.7           | 307.1408 | up         | 20.8                |
|                       | Epigallocatechin       | 25.1           | 456.204  | down       | -22.2               |
|                       | Isomaltose             | 25.1           | 73.0475  | down       | -17.2               |
|                       | Epigallocatechin       | 25.2           | 456.204  | down       | -22.9               |

Grapes treatments included ‘Victoria’ non-inoculated (V-NI), ‘Victoria’ inoculated with *Botrytis cinerea* B05.10 (V-B2), ‘Victoria’ inoculated with *B. cinerea* 242 (V-B2), ‘Shine Muscat’ non-inoculated (S-NI), ‘Shine Muscat’ inoculated with B05.10 (S-B5), and ‘Shine Muscat’ inoculated with 242 (S-B2).

Table S4 Differential volatile metabolites of grape ‘Shine Muscat’ leaves by comparing the group inoculated with *Botrytis cinerea* and the group without inoculation

| Days after treatment<br>(inoculated vs non-<br>inoculated groups) | Compound                                       | Time | M/Z      | Log <sub>2</sub> FC | Regulation |
|-------------------------------------------------------------------|------------------------------------------------|------|----------|---------------------|------------|
| 3 d                                                               | β -Pinene                                      | 12.0 | 93.0699  | 0.4                 | up         |
|                                                                   | 2,5-Dihydroxybenzaldehyde                      | 18.1 | 266.9997 | -0.3                | down       |
|                                                                   | Tetradecane                                    | 19.3 | 57.0709  | -0.7                | down       |
|                                                                   | 6,7-Dimethyl-1,2,3,5,8,8a-hexahydronaphthalene | 20.5 | 91.0545  | 20.1                | up         |
|                                                                   | α-Farnesene                                    | 27.6 | 57.0709  | -0.2                | down       |
| 6 d                                                               | p-Xylene                                       | 9.0  | 91.0054  | 19.9                | up         |
|                                                                   | Eucalyptol                                     | 13.9 | 119.0848 | 1.5                 | up         |
|                                                                   | trans-β-Ocimene                                | 14.2 | 145.9686 | 21.7                | up         |
|                                                                   | β-Ocimene                                      | 14.6 | 145.9681 | 4.7                 | up         |
|                                                                   | 2,4,6-Octatriene                               | 17.2 | 121.1007 | 4.1                 | up         |
|                                                                   | Dodecane                                       | 20.6 | 57.0704  | 0.1                 | up         |
|                                                                   | n-Tridecan-1-ol                                | 22.4 | 69.0700  | -19.1               | down       |
|                                                                   | 1-Octanol                                      | 22.8 | 69.0700  | 0.8                 | up         |
|                                                                   | 7-epi-Silphiperfol-5-ene                       | 24.2 | 175.1478 | 1.8                 | up         |
|                                                                   | Caryophyllene                                  | 25.4 | 91.0538  | 0.2                 | up         |
|                                                                   | Butylated Hydroxytoluene                       | 27.7 | 205.1583 | 0.5                 | up         |
| 9 d                                                               | trans-β-Ocimene                                | 14.3 | 145.9686 | 2.4                 | up         |
|                                                                   | β-Ocimene                                      | 14.6 | 145.9681 | 1.9                 | up         |
|                                                                   | 2,4,6-Octatriene                               | 17.2 | 121.1007 | 2.1                 | up         |
|                                                                   | 1,3-Cyclohexadiene                             | 17.6 | 121.1022 | 18                  | up         |
|                                                                   | 6,7-Dimethyl-1,2,3,5,8,8a-hexahydronaphthalene | 20.6 | 91.0541  | -0.7                | down       |
|                                                                   | Nonadecane                                     | 22.2 | 57.0599  | 1.2                 | up         |
|                                                                   | 1-Octanol                                      | 22.8 | 69.0700  | 0.2                 | up         |
|                                                                   | β-Guaiene                                      | 23.1 | 119.0856 | 0.1                 | up         |
|                                                                   | 7-epi-Silphiperfol-5-ene                       | 24.2 | 175.1478 | 1.0                 | up         |
|                                                                   | Silphiperfol-5-ene                             | 24.3 | 175.1483 | 1.4                 | up         |
|                                                                   | tert-Hexadecanethiol                           | 27.0 | 161.1327 | 2.0                 | up         |
|                                                                   | Butylated Hydroxytoluene                       | 27.7 | 205.1583 | 0.8                 | up         |
|                                                                   | Naphthalene                                    | 28.0 | 159.1168 | 1.8                 | up         |
